# Supplementary material for: Estrogen deficiency accelerates lumbar facet joints arthritis
Source: PubMed Central journal article supplement (PMC5431109; doi:10.1038/s41598-017-01427-7), 2017-05-03

## **Estrogen deficiency accelerates lumbar facet joints arthritis**

Hao Chen M.D.<sup>1#</sup>, Hai Zhu M.D.<sup>2#</sup>, Kai Zhang M.D., M.S.<sup>1</sup>, Kangwu Chen M.D.<sup>1\*</sup>,

and Huilin Yang M.D., Ph.D.<sup>1,3\*</sup>

<sup>1</sup>Department of Orthopaedics, The First Affiliated Hospital of Soochow University,  
No. 188 Shizi Street, Suzhou, Jiangsu215006, P.R. China

<sup>2</sup>Department of Orthopaedics, Affiliated Hospital of Nantong University, Xisi Road  
20, Nantong, Jiangsu226001, P.R. China

<sup>3</sup>Institute of Orthopaedics, Soochow University, No. 708 Renmin Road, Suzhou,  
Jiangsu215006, P.R. China

<sup>#</sup>Hao Chen and Hai Zhu contributed equally to this study

### **\*Corresponding authors:**

Huilin Yang

Email: suzhospine@hotmail.com

Tel & fax: +86-0512-67780111

Kangwu Chen

Email: kangwuchen2008@hotmail.com

Tel & fax: +86-0512-67780111

**Supplemental Figure 1:  
ER $\alpha$  staining of LFJ**

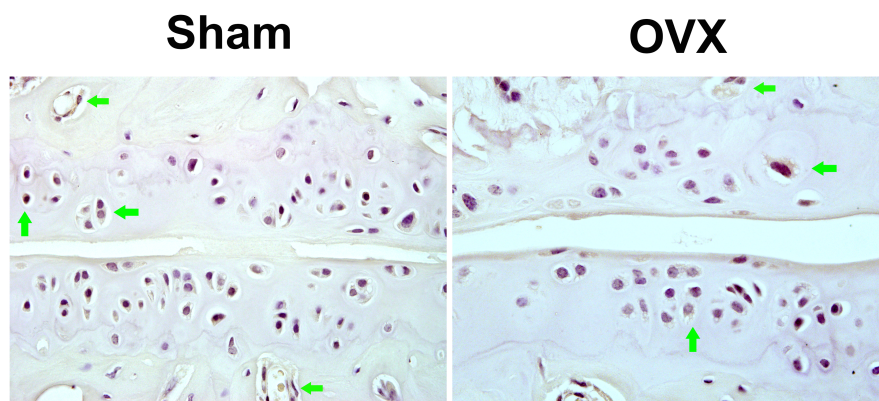

Green arrows pointed out some of the ER $\alpha$  positive cells in lumbar facet joint.

**Supplemental Figure 2:  
Grip force assays of different groups.**

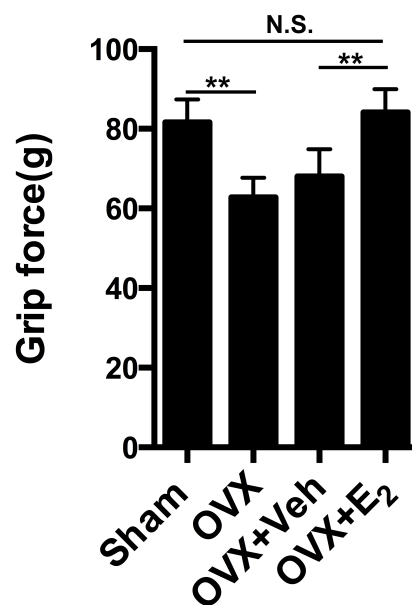

Supplement: 41598_2017_1427_MOESM1_ESM.pdf [file 41598_2017_1427_MOESM1_ESM.pdf]
